# Supplementary material for: Room temperature hydrogen production via electro-dehydrogenation of amines into nitriles: advancements in liquid organic hydrogen carriers
Source: Royal Society of Chemistry journal article supplement (doi:10.1039/d4gc01275e), 2024-01-01
Supplement: d4gc01275e1.pdf [file d4gc01275e1.pdf]

# Room temperature hydrogen production via electro-dehydrogenation of amines into nitriles: advancements in Liquid Organic Hydrogen Carriers

Nihal Guenani,<sup>1</sup> Jose Solera-Rojas,<sup>1</sup> David Carvajal,<sup>1</sup> Carmen Mejuto,<sup>1</sup> Andrés Mollar-Cuni,<sup>1</sup> Antonio Guerrero,<sup>1</sup> Francisco Fabregat-Santiago,<sup>1</sup> José A. Mata,<sup>\*1</sup> and Elena Mas-Marzá<sup>\*1</sup>

<sup>1</sup>Institute of Advanced Materials (INAM), Universitat Jaume I, 12006 Castelló, Spain.

Email: [emas@uji.es](mailto:emas@uji.es)

## Table of Contents

|                                                                                                                                  |          |
|----------------------------------------------------------------------------------------------------------------------------------|----------|
| <b>S1. General Methods</b> .....                                                                                                 | <b>2</b> |
| <b>S1.1. Materials</b> .....                                                                                                     | 2        |
| <b>S1.2. Electrode preparation</b> .....                                                                                         | 2        |
| <b>S1.3. Electrochemical measurements</b> .....                                                                                  | 2        |
| S1.3.1. Cyclic voltammetry.....                                                                                                  | 2        |
| S1.3.2. Impedance Spectroscopy (IS) .....                                                                                        | 3        |
| S1.3.3. Chronocoulometry analysis .....                                                                                          | 3        |
| <b>S1.4. Product Characterization</b> .....                                                                                      | 3        |
| <b>S1.4.1. Nuclear Magnetic Resonance (NMR) Spectroscopy</b> .....                                                               | 3        |
| <b>S1.4.2. Gas Chromatography (GC)</b> .....                                                                                     | 3        |
| <b>S1.4.3. Microscopy Electrode Characterization (SEM)</b> .....                                                                 | 4        |
| <b>S2. Experimental Procedures</b> .....                                                                                         | <b>4</b> |
| <b>S2.1. Electrode activation</b> .....                                                                                          | 4        |
| <b>S2.2. Temperature Effect</b> .....                                                                                            | 5        |
| <b>S2.3. Stability of NiNF electrodes</b> .....                                                                                  | 6        |
| <b>S2.4. <sup>1</sup>H-NMR Spectra</b> .....                                                                                     | 7        |
| S2.4.1. <sup>1</sup> H-NMR spectra for the electro-dehydrogenation of 1a using different Ni-bases electrodes in 1 M KOH .....    | 7        |
| S2.4.2. Influence of KOH amount in electro-dehydrogenation of 1a using NiNF .....                                                | 10       |
| S2.4.3. <sup>1</sup> H-NMR spectra of the electro-dehydrogenation of different amines using NiNF electrode in 0.5 M of KOH ..... | 12       |
| <b>S2.5. Adiponitrile stability</b> .....                                                                                        | 17       |
| <b>S2.6. Hydrogen detection</b> .....                                                                                            | 18       |

|                                              |    |
|----------------------------------------------|----|
| <b>S2.7. Hydrogenation experiments</b> ..... | 20 |
| <b>S3. References</b> .....                  | 21 |

## **S1. General Methods**

All working solutions were prepared, and all glassware cleaned using deionized water (Millipore MilliQ, 18.2 M $\Omega$  cm).

### **S1.1. Materials**

All reagents were used from the commercial suppliers without further purification. Na<sub>2</sub>SO<sub>4</sub> (Sigma Aldrich, 99.0%), NiCl<sub>2</sub>·6 H<sub>2</sub>O (Sigma Aldrich, 99.999%), Ti (Sigma Aldrich, 99.7%), Ni (<150 $\mu$ m, Sigma Aldrich 99.99%), PGR (4B hardness, 2.0 mm diameter and 13.0 mm length, ©STAEDTLER mars GmbH & CO, KG, made in Germany), KOH (Sigma Aldrich, 99.99%), Nafion 117 membrane (Sigma Aldrich), Ni foam (GoodFellow, 99.5%, thickness 6 mm).

### **S1.2. Electrode preparation**

**NiNF:** This electrode was prepared through electrodeposition of Ni onto nickel foam (NF), using NiCl<sub>2</sub>. The electrodeposition process was carried out using cyclic voltammetry in a one-compartment cell with a three-electrode configuration. In a typical experiment, a 2 cm<sup>2</sup> nickel foam working electrode was immersed in a 0.1 M Na<sub>2</sub>SO<sub>4</sub> and 0.02 M NiCl<sub>2</sub>·6 H<sub>2</sub>O solution. Reference and counter electrodes were Ag/AgCl and Pt wire, respectively. The cyclic voltammetry conditions for the electrodeposition involved 25 cycles ranging from -1.3 to 0 V vs Ag/AgCl, at a scan rate of 50 mV·s<sup>-1</sup>, under magnetic stirring.

**NiPGR:** This electrode was prepared through electrodeposition of Ni pencil graphite rod (PGR). Electrodeposition process as previously described for NiNF.

**Ni45:** This electrode was prepared using a previously reported method<sup>1</sup> by mixing 550 mg of Ti (100 mesh) and 450 mg of Ni (< 150  $\mu$ m), powders in a pestle and mortar. The powder was introduced into a die equipped with a set of screws and nuts to be able to retain the pressure. An axial pressure of 5 ton was applied to the punch. Then, the electrode obtained was introduced into an oven and heated at 500 °C during 3 h.

### **S1.3. Electrochemical measurements**

#### **S1.3.1. Cyclic voltammetry**

Cyclic Voltammetry experiments were performed in a one-compartment cell with three electrodes, using a Gamry (Reference 3000<sup>tm</sup>) potentiostat/galvanostat. A Pt wire and Ag/AgCl (3 M KCl) were used as counter and reference electrodes, respectively. Nickel electrodes were employed as working electrodes.

Measurements were done in a 20 mL of 0.25 to 1 M solution of KOH with magnetic stirring. Cyclic voltammeteries in the absence and presence of amines were measured at a scan rate of 10 mV/s from 0 to 1 V vs Ag/AgCl.

### **S1.3.2. Impedance Spectroscopy (IS)**

Impedance Spectroscopy (IS) experiments were performed in a one-compartment cell with three electrodes, using a Biologic Science Instruments VSP. The NiNF (2 cm<sup>2</sup>) electrode was used as working electrode with 20 mL of 0.5 M KOH solution and 50 mM 1,6-hexanediamine in one-compartment cell. The measurements of IS were done in the potential range of 0 to 1 V (vs Ag/AgCl), at steps of 25 mV and 50 mV. The frequency used ranged from 400 kHz to 3 mHz.

### **S1.3.3. Chronocoulometry analysis**

Chronocoulometry experiments were carried out in a glass cell with two compartments using a three-electrode assembly for electrochemical dehydrogenation of primary amines at room temperature, pressure and under magnetic stirring on the anode compartment. Current density and voltage dependence were measured with a Gamry (Reference 3000<sup>mm</sup>). 20 mL of 0.5 M KOH was used as electrolyte at pH 13.6, as obtained after saturation with N<sub>2</sub>. Pt wire was used as a counter electrode and was separated from the working electrode (NiNF) using a proton exchange Nafion 117 membrane. Ag/AgCl in 3 M aqueous KCl solution was used as a reference electrode and potentials were corrected with reference to the Reversible Hydrogen Electrode (RHE) scale after the experiments. *J-V* curves and chronoamperometry measurements were recorded and the organic products formation were analyzed by <sup>1</sup>H-NMR spectroscopy and gas chromatography (GC-FID).

## **S1.4. Product Characterization**

### **S1.4.1. Nuclear Magnetic Resonance (NMR) Spectroscopy**

<sup>1</sup>H-NMR spectra were collected on a 400 MHz Bruker spectrometer. All samples were prepared taking 100 μL of sample and adding 500 μL of deuterated water (D<sub>2</sub>O), using ethylene glycol (EG) as internal integration standard.

### **S1.4.2. Gas Chromatography (GC)**

GC analyses of the reaction liquid products were obtained on a Shimadzu GC-2010 apparatus equipped with a FID detector, and using a Teknokroma column (TRB-5MS, 30 m x 0.25 mm x 0.25 μm). Gaseous products generated in the reaction were analyzed using an Agilent micro-GC 490, equipped with a molecular sieve (MS5) column and a TCD detector. Argon was used as the carrier gas at 19.9 mL min<sup>-1</sup>.

### S1.4.3. Microscopy Electrode Characterization (SEM)

The scanning electron microscopy (SEM) measurements were carried out in a JEOL 7001F equipment operating at 15 kV.

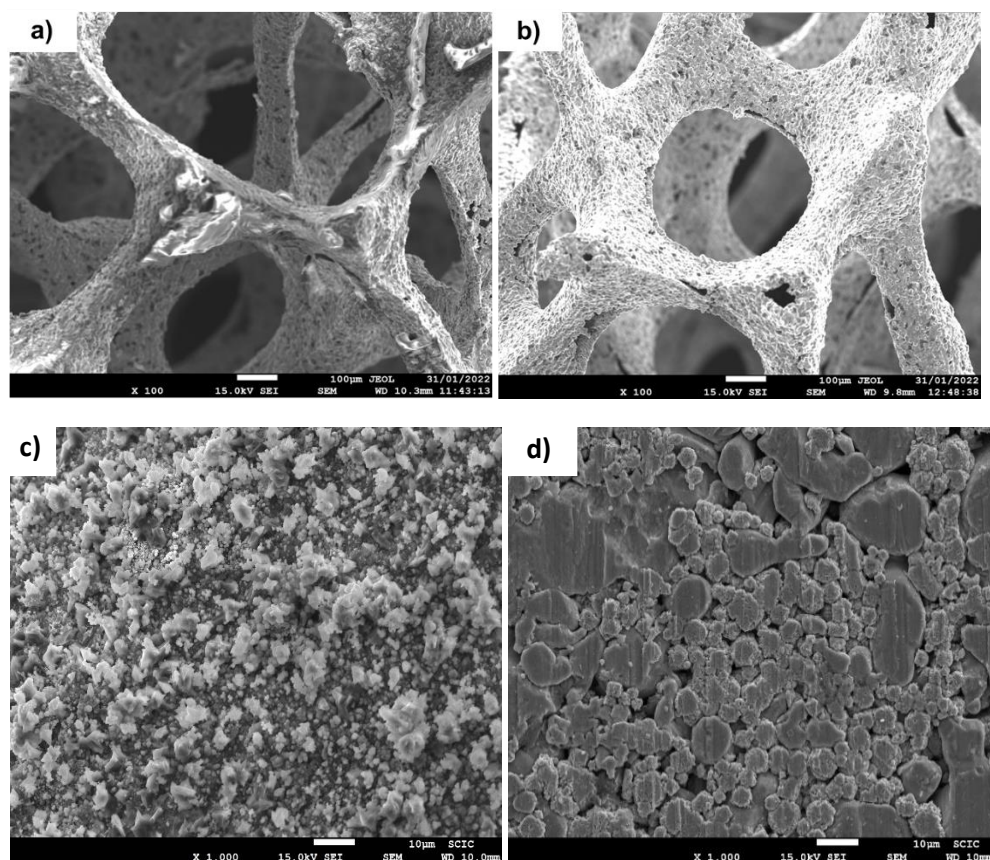

**Figure S1.** SEM images of **a)** commercial Nickel Foam (NF), **b)** commercial Nickel Foam after nickel electrodeposition (NiNF), **c)** Pencil graphite rods with after nickel electrodeposition (NiPGR) and **d)** Ni45.

## S2. Experimental Procedures

### S2.1. Electrode activation

The activation of nickel electrodes was performed by CV in 1 M KOH, performing 10 cycles in each case, under magnetic stirring. This methodology was used to increase the amount of electroactive species on the surface of the electrodes. The reversible redox peak observed during the activation process by CV shows the transformation of  $\alpha/\beta$ -Ni(OH)<sub>2</sub> (Ni<sup>2+</sup>) to catalytically active  $\beta$ -NiOOH (Ni<sup>3+</sup>).

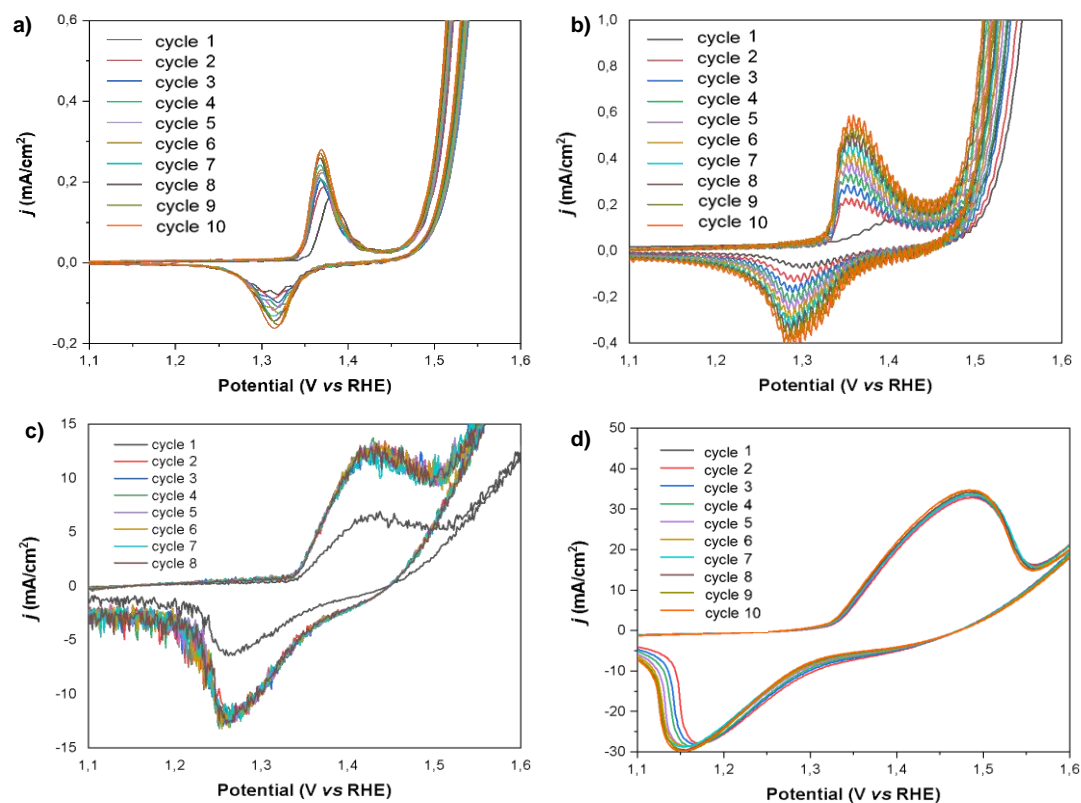

**Figure S2.** Activation of the nickel electrodes by CV in 1 M KOH, at a scan rate of  $10 \text{ mV} \cdot \text{s}^{-1}$ . **a)** Ni foil, **b)** Ni foam, **c)** NiPGR, **d)** NiNF

## S2.2. Temperature Effect

| Table S1. Temperature effect on the electrochemical oxidation of <b>1a</b> to <b>2a</b> . |                  |                        |                   |      |
|-------------------------------------------------------------------------------------------|------------------|------------------------|-------------------|------|
| Entry                                                                                     | Temperature (°C) | % Conversion <b>1a</b> | % Yield <b>2a</b> |      |
|                                                                                           |                  |                        | % Yield           | % FE |
| 1                                                                                         | 25               | 99                     | 90                | 95   |
| 2                                                                                         | 40               | 96                     | 91                | 81   |
| 3                                                                                         | 60               | 100                    | 24                | 24   |

Reaction conditions: 25 mM **1a** in 0.5 M KOH, under magnetic stirring in the anode compartment with NiNF as working electrode.

### S2.3. Stability of NiNF electrodes

| <b>Table S2.</b> Results in the stability test for the electrooxidation of <b>1a</b> to <b>2a</b> using the same electrode. |            |                            |                |             |
|-----------------------------------------------------------------------------------------------------------------------------|------------|----------------------------|----------------|-------------|
| <b>Entry</b>                                                                                                                | <b>Run</b> | <b>% Conversion<br/>1a</b> | <b>% Yield</b> | <b>% FE</b> |
|                                                                                                                             |            |                            | <b>2a</b>      |             |
| 1                                                                                                                           | 1          | 99                         | 84             | 84          |
| 2                                                                                                                           | 2          | 100                        | 85             | 85          |
| 3                                                                                                                           | 3          | 100                        | 82             | 82          |
| 4                                                                                                                           | 4          | 97                         | 89             | 89          |
| 5                                                                                                                           | 5          | 100                        | 83             | 83          |

Reaction conditions: 25 mM **1a** in 0.5 M KOH, under magnetic stirring in the anode compartment with NiNF as working electrode.

## S2.4. $^1\text{H}$ -NMR Spectra

Following figures show  $^1\text{H}$ -NMR spectra recorded before ( $t = 0$ ) and after the chronoamperometry experiments

### S2.4.1. $^1\text{H}$ -NMR spectra for the electro-dehydrogenation of **1a** using different Ni-bases electrodes in 1 M KOH

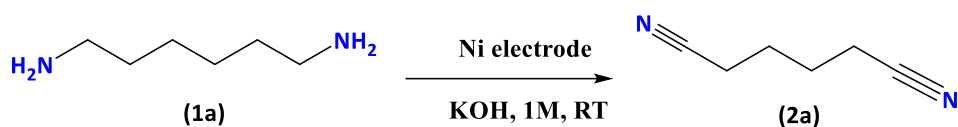

Scheme S1. Electrodehydrogenation of **1a** using Ni-based electrodes in 1 M KOH

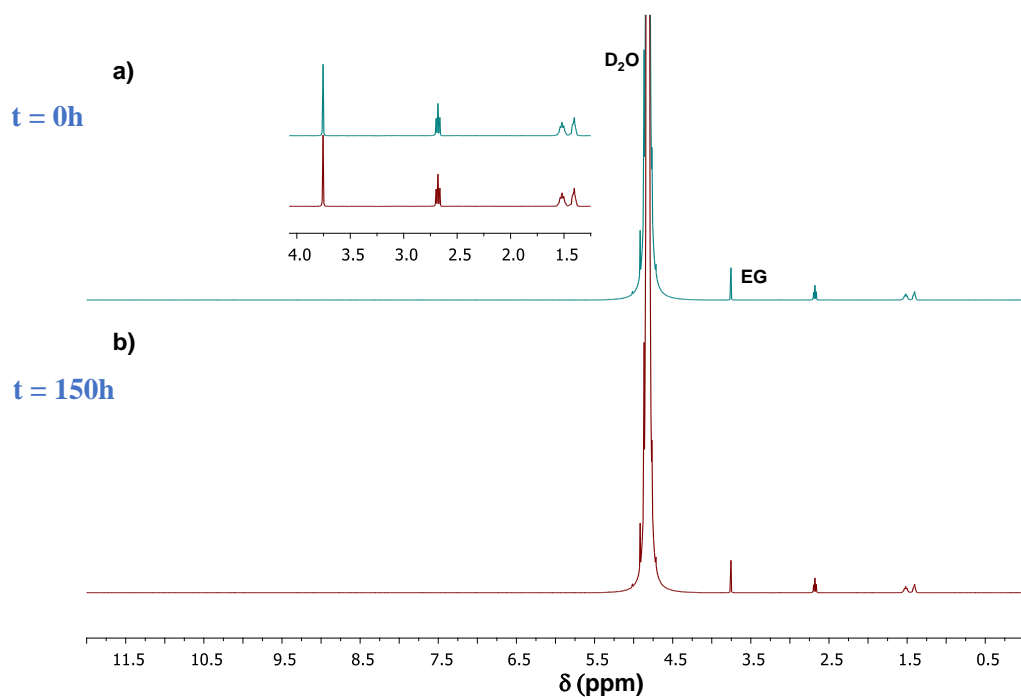

Figure S3. a)  $^1\text{H}$ -NMR spectrum of **1a** before starting the reaction. b)  $^1\text{H}$ -NMR spectrum of the liquid products at  $t = 150\text{h}$ .

Ethylene glycol (EG) as internal standard. Inset: Zoom of  $^1\text{H}$  NMR spectrum in the region of 1 to 4 ppm. Electro-dehydrogenation conditions: 25mM **1a** in a 1 M KOH solution at 1.55 V vs RHE using Ni foil.

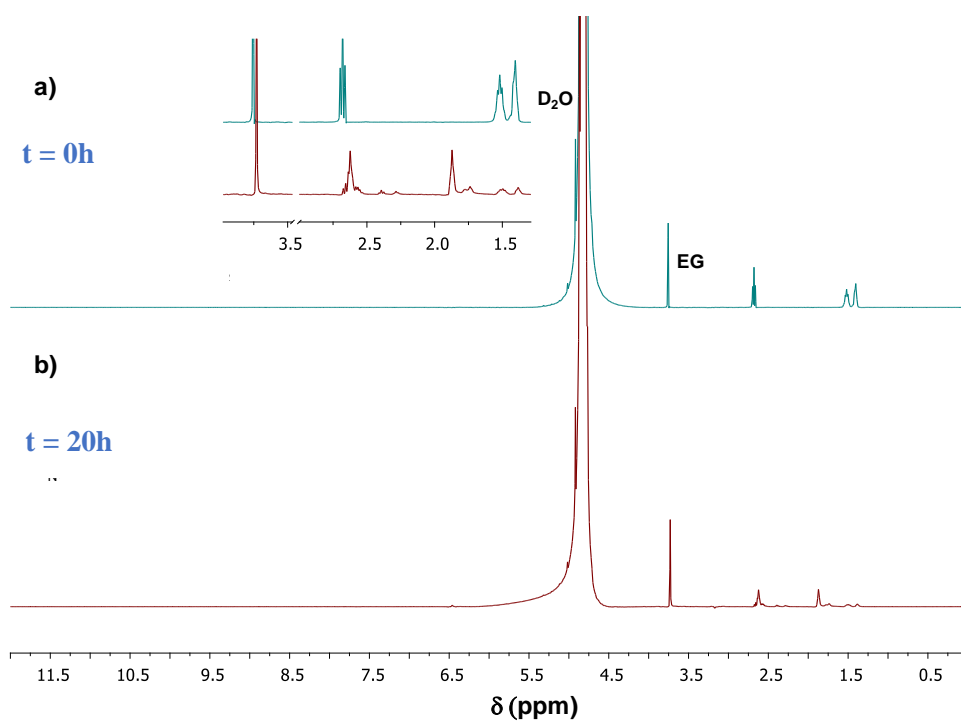

**Figure S4. a)**  $^1\text{H-NMR}$  spectrum of **1a** before starting the reaction. **b)**  $^1\text{H-NMR}$  spectrum of the liquid products at  $t = 20\text{h}$ . Ethylene glycol (EG) as internal standard. Inset: Zoom of  $^1\text{H NMR}$  spectrum in the region of 1 to 4 ppm. Electro-dehydrogenation conditions: 25mM **1a** in a 1 M KOH solution at 1.55 V vs RHE using NiF.

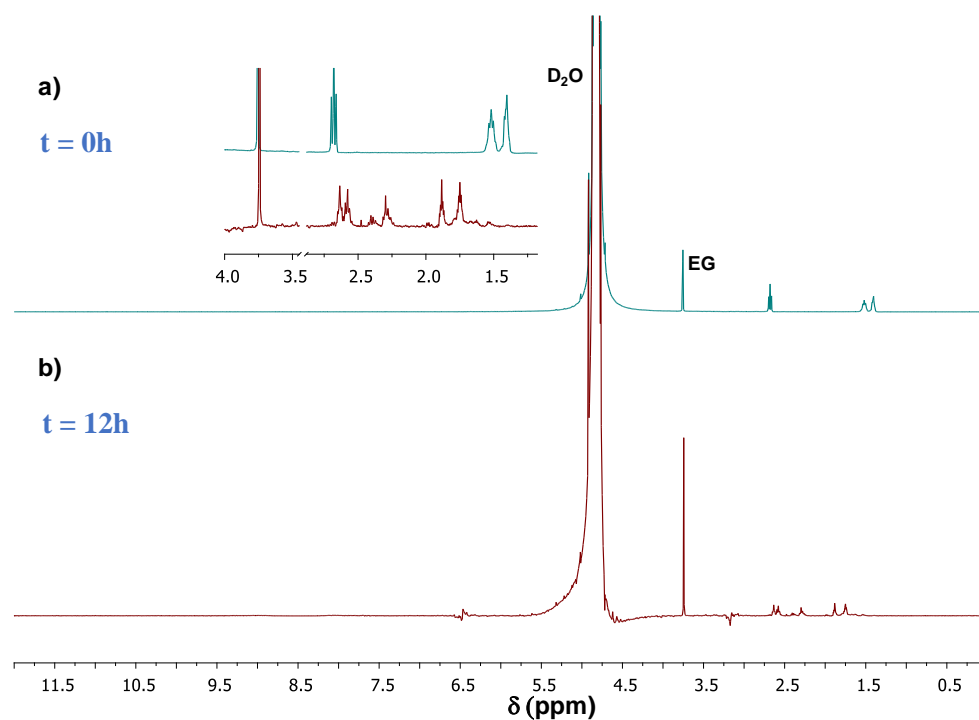

**Figure S5. a)**  $^1\text{H-NMR}$  spectrum of **1a** before starting the reaction. **b)**  $^1\text{H-NMR}$  spectrum of the liquid products at  $t = 12\text{h}$ . Ethylene glycol (EG) as internal standard. Inset: Zoom of  $^1\text{H NMR}$  spectrum in the region of 1 to 4 ppm. Electro-dehydrogenation conditions: 25mM **1a** in a 1 M KOH solution at 1.55 V vs RHE using NiPGR.



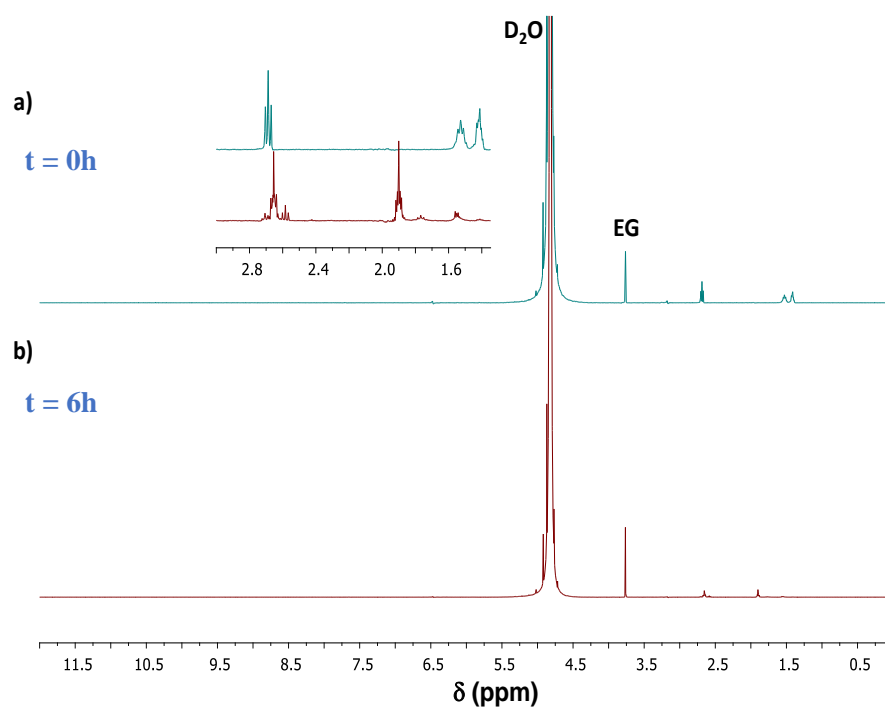

**Figure S6.** a)  $^1\text{H-NMR}$  spectrum of **1a** before starting the reaction. b)  $^1\text{H-NMR}$  spectrum of the liquid products at  $t = 6\text{h}$ . Ethylene glycol (EG) as internal standard. Inset: Zoom of  $^1\text{H NMR}$  spectrum in the region of 1.5 to 3 ppm. Electro-dehydrogenation conditions: 25mM **1a** in a 1 M KOH solution at 1.55 V vs RHE using Ni45.

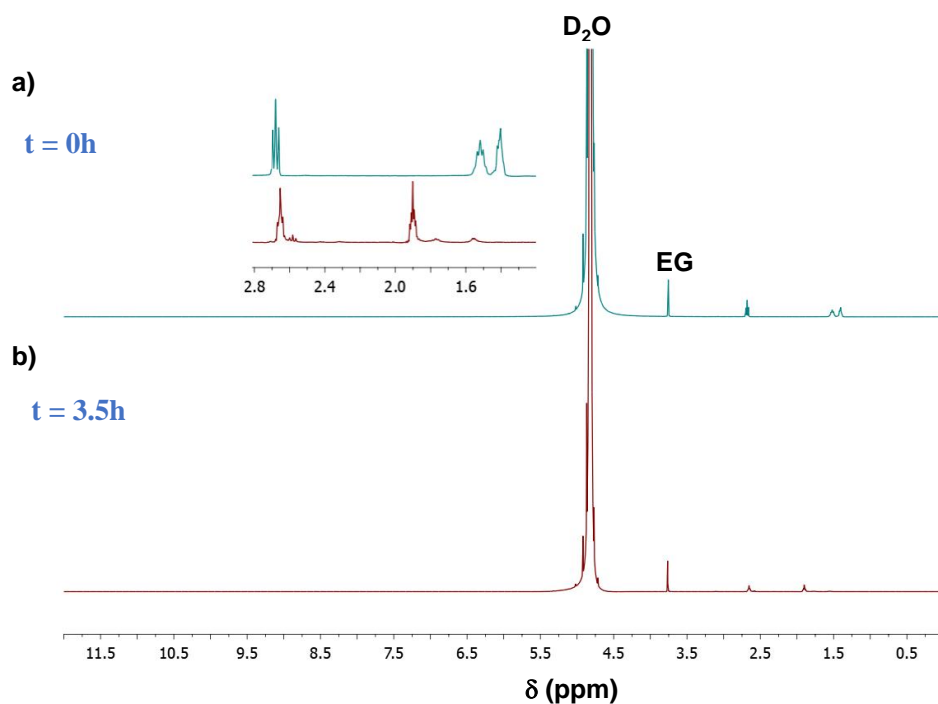

**Figure S7.** a)  $^1\text{H-NMR}$  spectrum of **1a** before starting the reaction. b)  $^1\text{H-NMR}$  spectrum of the liquid products at  $t = 3.5\text{h}$ . Ethylene glycol (EG) as internal standard. Inset: Zoom of  $^1\text{H NMR}$  spectrum in the region of 1.3 to 3.8 ppm. Electro-dehydrogenation conditions: 25mM **1a** in a 1 M KOH solution at 1.55 V vs RHE using NiF.

### S2.4.2. Influence of KOH amount in electro-dehydrogenation of **1a** using NiNF

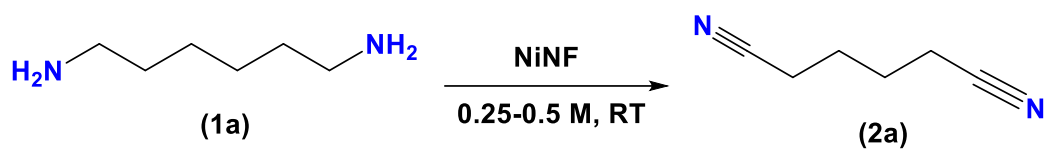

Scheme S2. Electrodehydrogenation of **1a** using NiNF in 0.25 and 0.5 M KOH

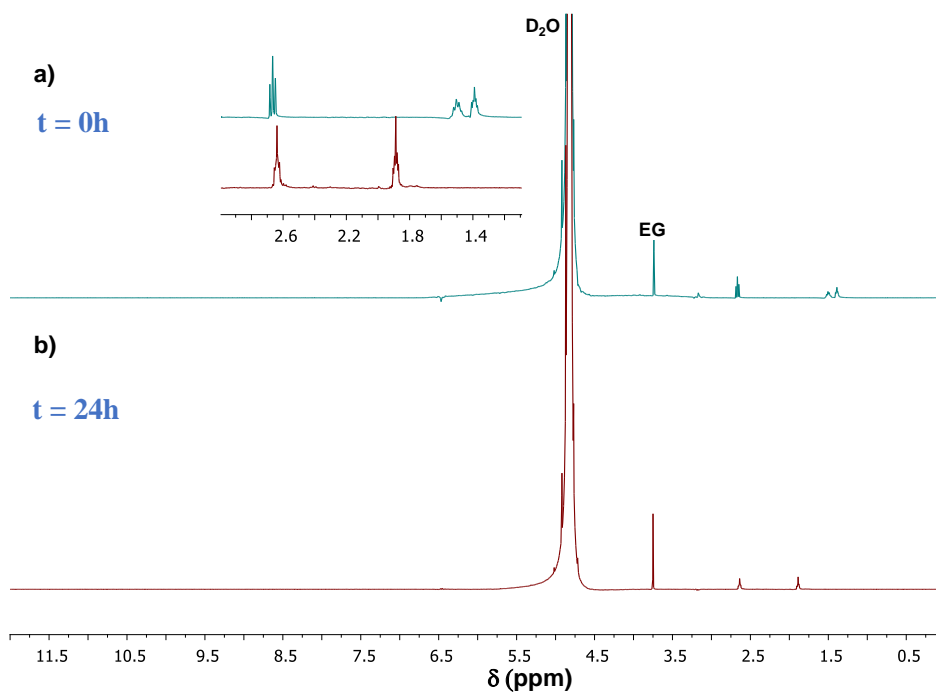

Figure S8. a)  $^1\text{H}$ -NMR spectrum of **1a** before starting the reaction. b)  $^1\text{H}$ -NMR spectrum of the liquid products at  $t = 24\text{h}$ . Inset: Zoom of  $^1\text{H}$  NMR spectrum in the region of 1 to 3 ppm. Electro-dehydrogenation conditions: 25mM **1a** in a 0.25 M KOH solution at 1.55 V vs RHE.

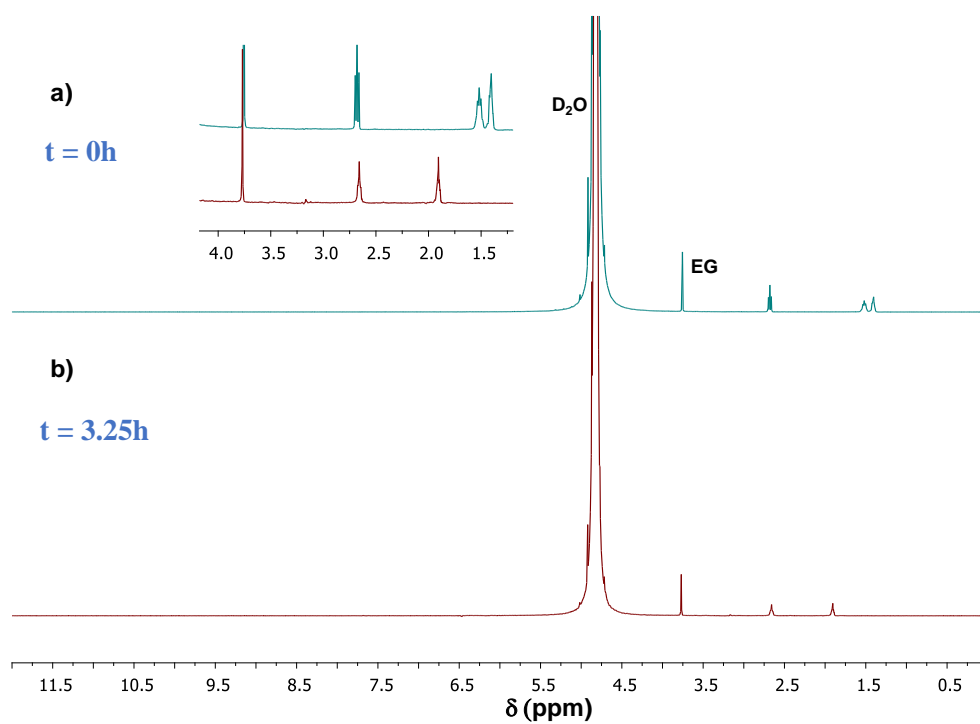

**Figure S9.** a) <sup>1</sup>H-NMR spectrum of **1a** before starting the reaction. b) <sup>1</sup>H-NMR spectrum of the liquid products at  $t = 3.25\text{h}$ . Inset: Zoom of <sup>1</sup>H NMR spectrum in the region of 1 to 3 ppm. Electro-dehydrogenation conditions: 25mM **1a** in a 0.50 M KOH solution at 1.55 V vs RHE.

**S2.4.3.  $^1\text{H}$ -NMR spectra of the electro-dehydrogenation of different amines using NiNF electrode in 0.5 M of KOH**

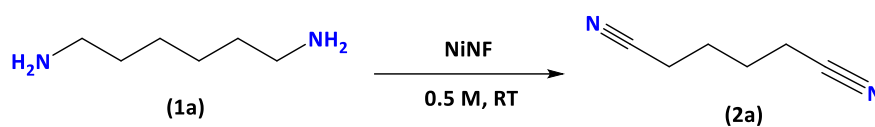

**Scheme S3.** Electro-dehydrogenation of **1a** using NiNF.

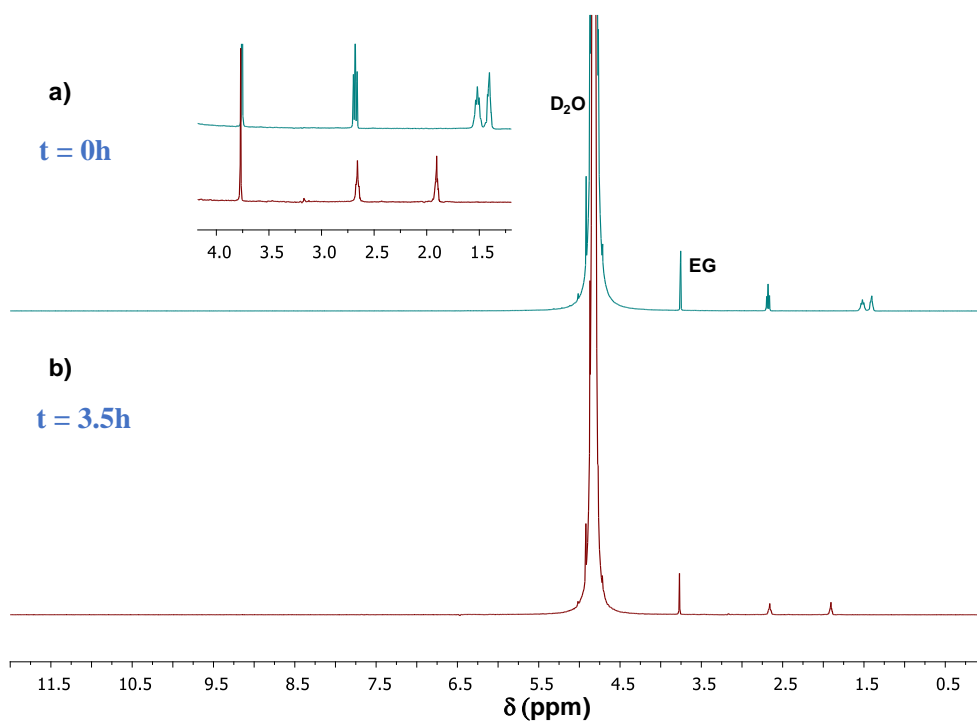

**Figure S10.** a)  $^1\text{H}$ -NMR spectrum of **1a** before starting the reaction. b)  $^1\text{H}$ -NMR spectrum of the liquid products at  $t = 3.25\text{h}$ . Inset: Zoom of  $^1\text{H}$  NMR spectrum in the region of 1 to 3 ppm. Electro-dehydrogenation conditions: 25mM **1a** in a 0.50 M KOH solution at 1.55 V vs RHE.

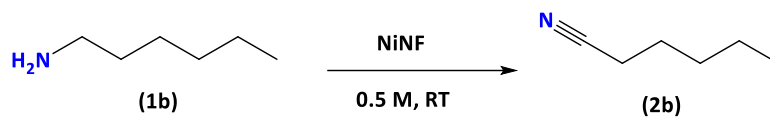

**Scheme S4.** Dehydrogenation of **1b** using NiNF.

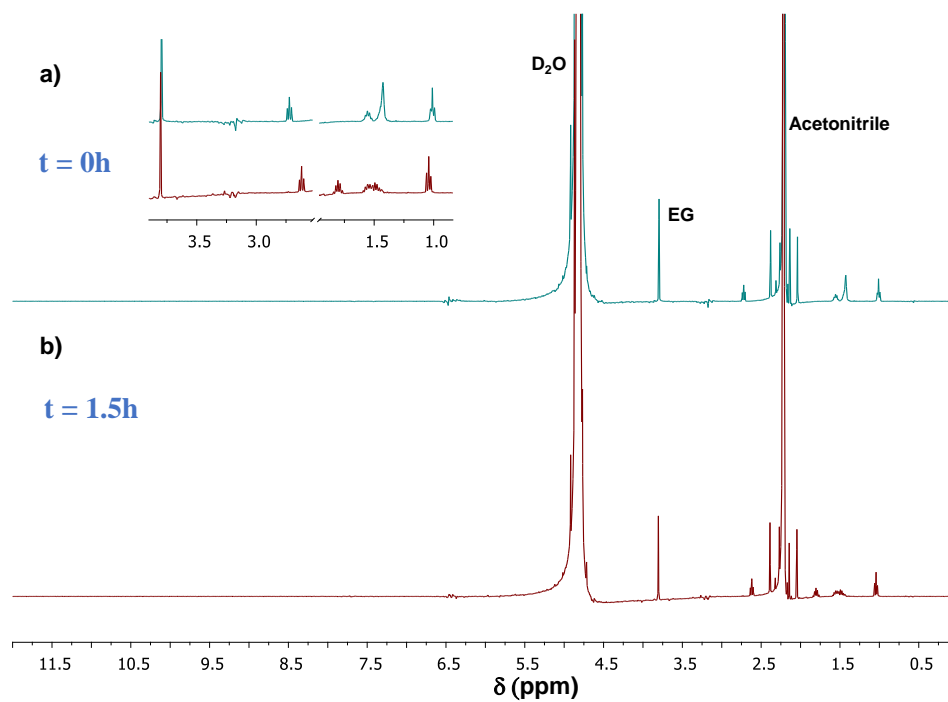

**Figure S11.** a)  $^1\text{H-NMR}$  spectrum of **1b** before starting the reaction. b)  $^1\text{H-NMR}$  spectrum of the liquid products at  $t = 1.5\text{h}$ . Inset: Zoom of  $^1\text{H-NMR}$  spectrum in the region of 0.9 to 4 ppm. Electro-dehydrogenation conditions: 25mM **1b** in a 0.50 M KOH solution at 1.55 V vs RHE.

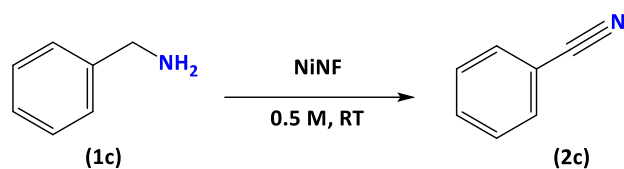

**Scheme S5.** Dehydrogenation of **1c** using NiNF.

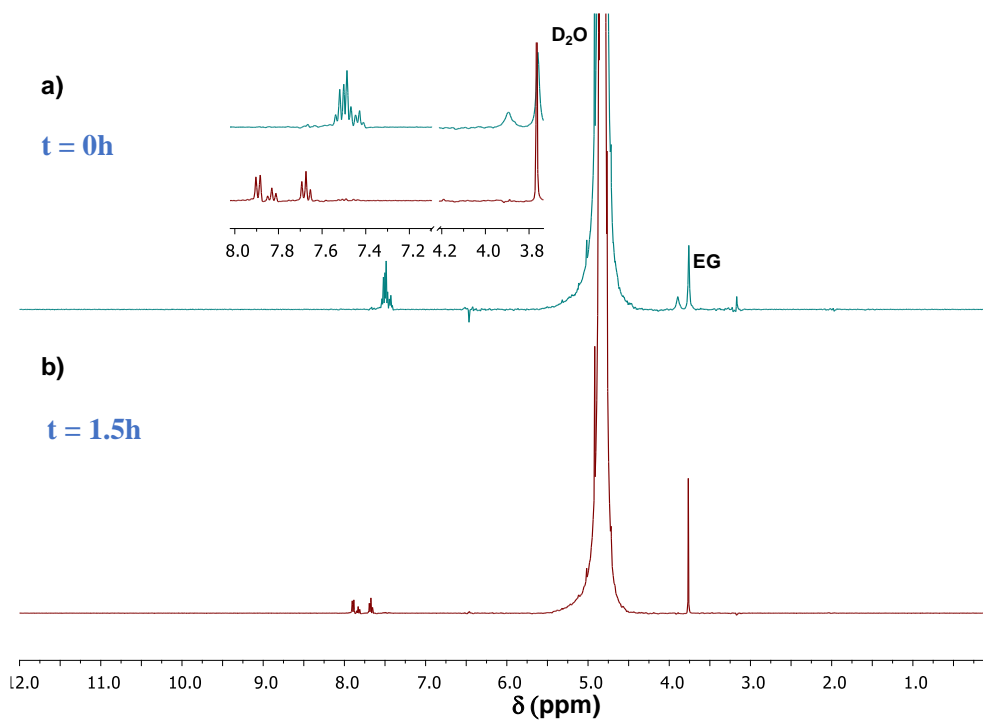

**Figure S12.** a)  $^1\text{H}$ -NMR spectrum of **1c** before starting the reaction. b)  $^1\text{H}$ -NMR spectrum of the liquid products at  $t = 1.5\text{h}$ . Inset: Zoom of  $^1\text{H}$  NMR spectrum in the region of 3.5 to 8 ppm. Electro-dehydrogenation conditions: 25mM **1c** in a 0.50 M KOH solution at 1.55 V vs RHE.

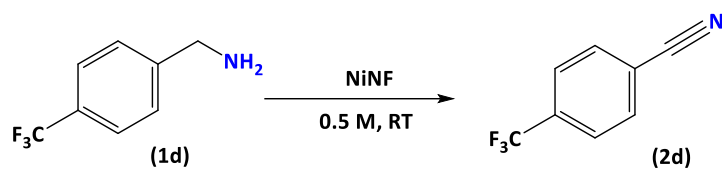

**Scheme S6.** Dehydrogenation of **1d** using NiNF.

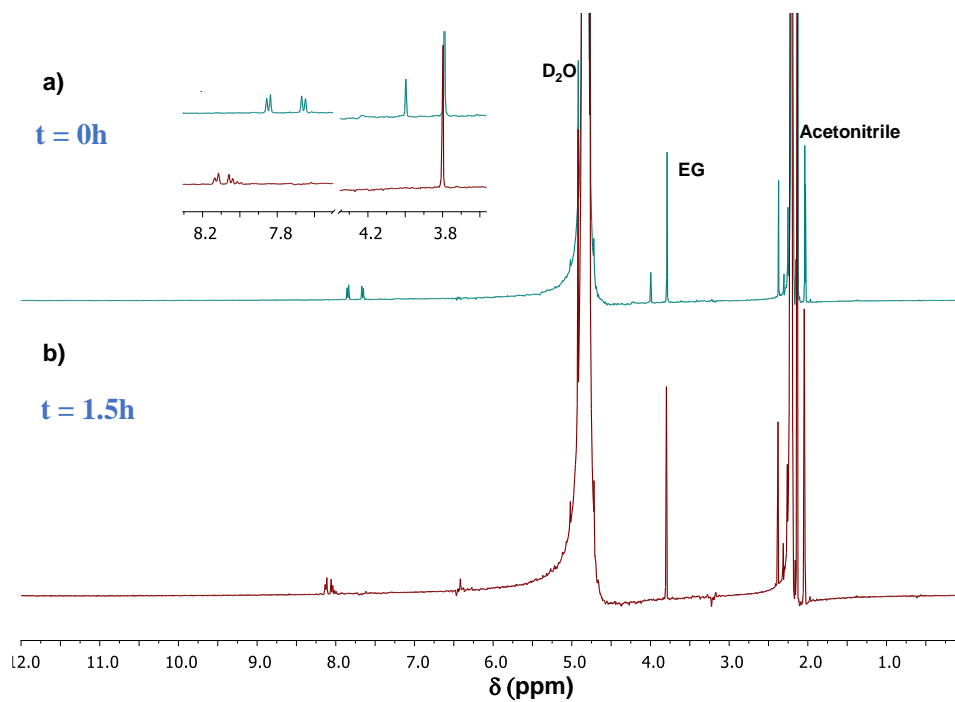

**Figure S13.** a)  $^1\text{H-NMR}$  spectrum of **1d** before starting the reaction. b)  $^1\text{H-NMR}$  spectrum of the liquid products at  $t = 1.5\text{h}$ . Inset: Zoom of  $^1\text{H NMR}$  spectrum in the region of 3.5 to 8.3 ppm. Electro-dehydrogenation conditions: 25mM **1d** in a 0.50 M KOH solution at 1.55 V vs RHE.

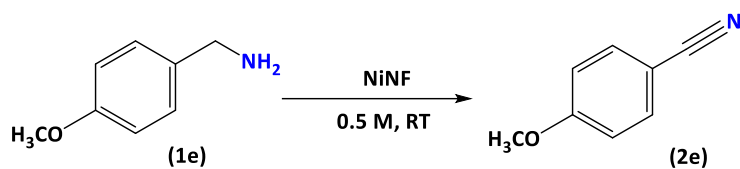

**Scheme S7.** Dehydrogenation of **1e** using NiNF.

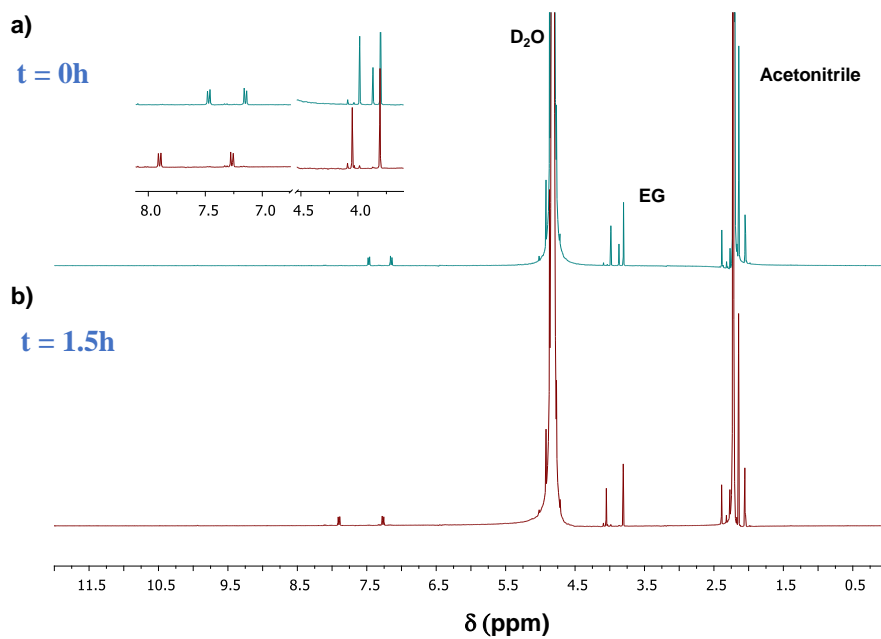

**Figure S14.** a) <sup>1</sup>H-NMR spectrum of **1e** before starting the reaction. b) <sup>1</sup>H-NMR spectrum of the liquid products at  $t = 1.5\text{h}$ . Inset: Zoom of <sup>1</sup>H NMR spectrum in the region of 3 to 8 ppm. Electro-dehydrogenation conditions: 25mM **1e** in a 0.50 M KOH solution at 1.55 V vs RHE.



## S2.5. Adiponitrile stability

A 25 mM solution of adiponitrile in aqueous media with KOH was stirred at room temperature for 20 hours. The solution was extracted in CH<sub>2</sub>Cl<sub>2</sub>/H<sub>2</sub>O (3 x 20ml), and the organic phase was dried under vacuum. Subsequently, it was analysed by <sup>1</sup>H-NMR spectroscopy using 1,3,5-trimethoxybenzene (TMB) as internal standard. The spectrum indicates a 30% loss of the starting material (Figure S16). Following this, the aqueous phase was neutralized and extracted in CH<sub>2</sub>Cl<sub>2</sub>/H<sub>2</sub>O once again undergoing the same procedure. In this case, the <sup>1</sup>H-NMR spectrum reveals the formation of amide-based subproducts, which contribute to previous losses of the starting material. (Figure S17).

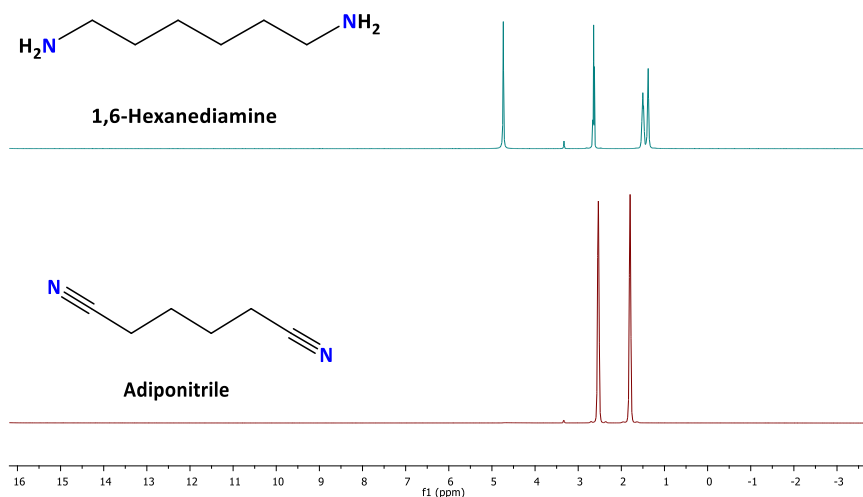

**Figure S15.** <sup>1</sup>H-NMR spectra of **1a** (top) and **2a** (bottom) commercially available in MeOD.

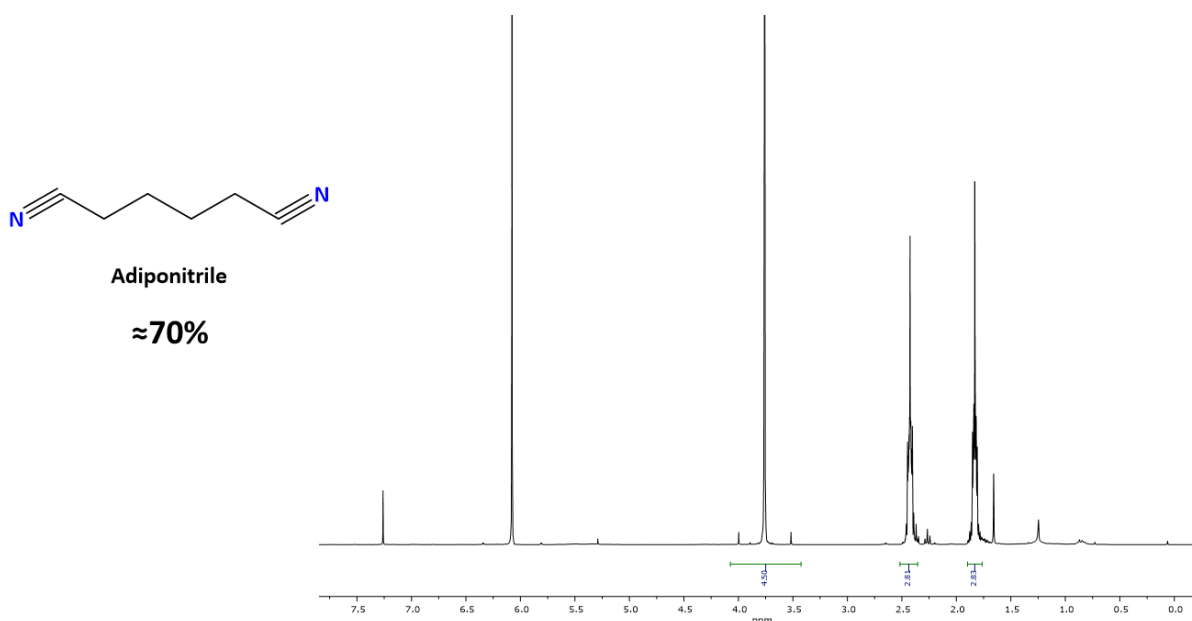

**Figure S16.**  $^1\text{H-NMR}$  spectrum of organic phase in  $\text{CDCl}_3$ . TMB as internal standard (signals at 3.75 and 6.2 ppm).

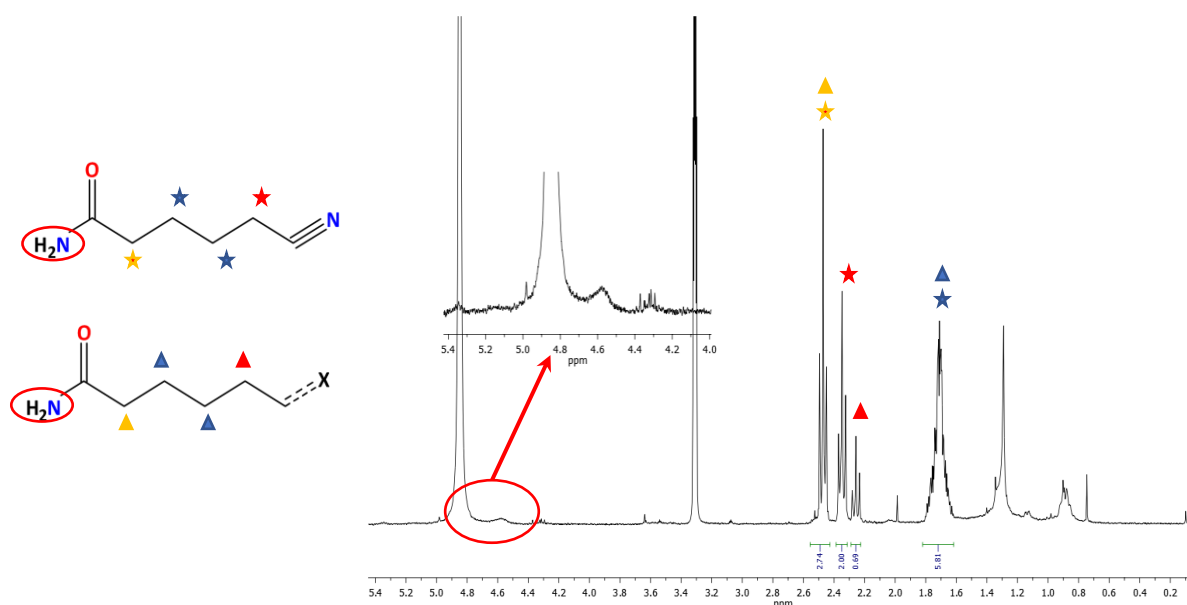

**Figure S17.** Zoom  $^1\text{H-NMR}$  spectrum in MeOD of the second organic phase extracted.

## S2.6. Hydrogen detection

To identify the gases produced during the catalytic electro-oxidation of **1a**, we conducted two chronoamperometry experiments in the presence and in the absence of **1a**. Chronoamperometries were performed in a one-compartment cell utilizing a three-electrode setup at room temperature and ambient pressure. Prior to experimentation, the cell was purged with argon for 3 hours. Current density and voltage dependence were measured using a potentiostat/galvanostat (AUTOLAB PGSTAT302N). A 20 mL solution of 0.5 M KOH at pH 13.6 served as the electrolyte, with a Pt wire as the counter electrode,

Ag/AgCl in 3 M KCl as the reference electrode, and NiNF as the working electrode. The applied voltage was set at 0.55 V vs Ag/AgCl, and argon was bubbled during the whole experiment.

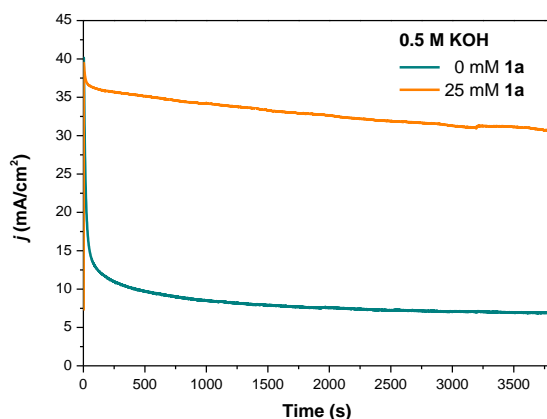

**Figure S18.** Chronoamperometry using NiNF as working electrode at a constant voltage of 1.5 V vs RHE with and without **1a**.

With the aim to identify the generated gas products, the cell was connected to a gas chromatograph (Agilent micro-GC 490), equipped with a molecular sieve (MS5) column and a TCD detector, has been used. Argon was used as the carrier gas at 19.9 mL min<sup>-1</sup> Figure S18 show three chromatograms after 1h reaction. Black line is the response of the detector where we don't see the presence of any gas. Green line shows the reaction without **1a**, where we can observe hydrogen and traces of oxygen, due to the OER. Orange line corresponds to the reaction in the presence of **1a**, showing an increase of the intensity signal of hydrogen gas and no oxygen detection, suggesting that OER reaction was avoided and oxidation of amine into nitrile was achieved.

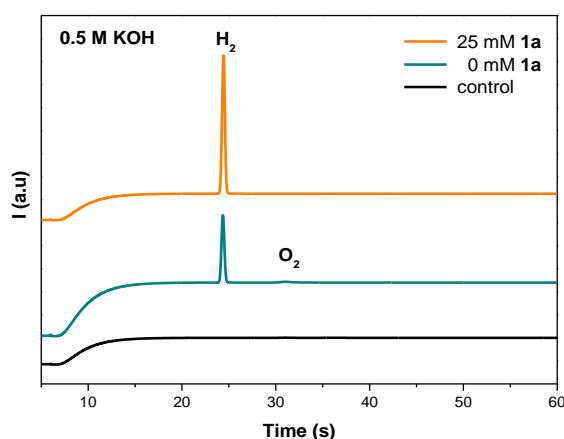

**Figure S19.** Detection of molecular hydrogen with (orange line) and without (green line) **1a**.

## S2.7. Hydrogenation experiments

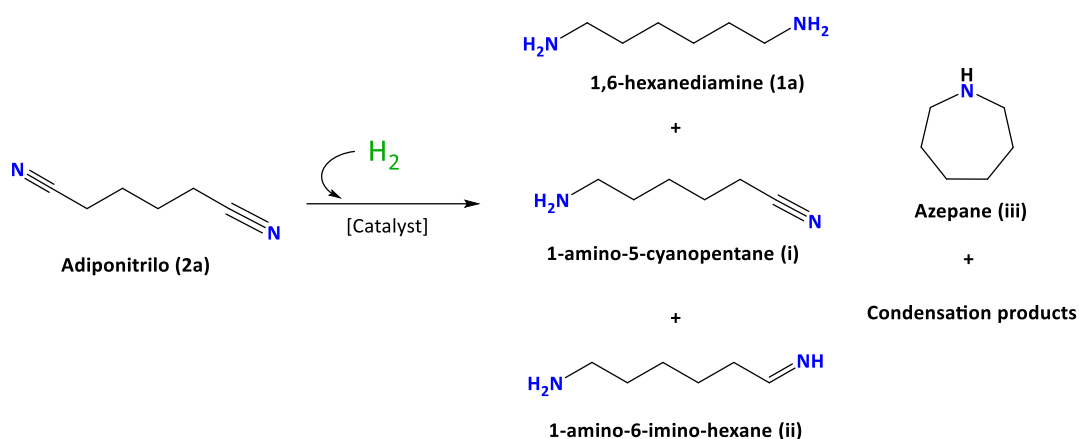

**Scheme S8.** Possible products for the hydrogenation of adiponitrile.

In a general catalytic experiment, a 2 mL vial equipped with a stirring bar was charged with the catalyst, 0.15 mmol of nitrile, 1 mL of isopropanol and the specified amount of 28% aqueous NH<sub>4</sub>OH solution as additive. The charged vial was then introduced in a high-pressure autoclave. The reactor was purged 3 times with H<sub>2</sub> before pressurizing at 20 bars. The system was heated at 80 °C for 6 h. After this time, the reactor was left to reach room temperature and H<sub>2</sub> was released. Yields and conversions were determined by GC and/or <sup>1</sup>H-NMR analysis using anisole as an internal standard.

| Table S3. Optimization of reaction conditions in the hydrogenation of adiponitrile |                                         |               |                      |        |                            |           |                              |
|------------------------------------------------------------------------------------|-----------------------------------------|---------------|----------------------|--------|----------------------------|-----------|------------------------------|
| Entry                                                                              | Catalyst (mol%)                         | Solvent       | H <sub>2</sub> (bar) | T (°C) | Additive                   | Conv. (%) | Selectivity (1a/i/ii/iii/cp) |
| 1                                                                                  | Pd/C (1)                                | Toluene       | 10                   | 80     | -                          | -         | -                            |
| 2                                                                                  | Pd/C (1)                                | MeOH          | 10                   | 80     | -                          | -         | -                            |
| 3                                                                                  | Pd/C (1)                                | <i>i</i> PrOH | 20                   | 80     | NH <sub>4</sub> OH (100μL) | 76        | 0/9/0/0/91                   |
| 4                                                                                  | Pd/Al <sub>2</sub> O <sub>3</sub> (1)   | <i>i</i> PrOH | 20                   | 80     | NH <sub>4</sub> OH (100μL) | 53        | 0/9/1/3/87                   |
| 5                                                                                  | Pt/Al <sub>2</sub> O <sub>3</sub> (1)   | <i>i</i> PrOH | 20                   | 80     | NH <sub>4</sub> OH (100μL) | 63        | 4/58/5/15/18                 |
| 6                                                                                  | Ru/Al <sub>2</sub> O <sub>3</sub> (1)   | <i>i</i> PrOH | 20                   | 80     | NH <sub>4</sub> OH (100μL) | 58        | 16/75/4/5/0                  |
| 7                                                                                  | Ru/Al <sub>2</sub> O <sub>3</sub> (2,5) | <i>i</i> PrOH | 20                   | 80     | NH <sub>4</sub> OH (100μL) | 76        | 17/70/7/16/0                 |
| 8                                                                                  | Ru/Al <sub>2</sub> O <sub>3</sub> (2,5) | <i>i</i> PrOH | 20                   | 80     | NH <sub>4</sub> OH (200μL) | 100       | 80/0/5/15/0                  |
| 9                                                                                  | Ru/C (1)                                | <i>i</i> PrOH | 20                   | 80     | NH <sub>4</sub> OH (100μL) | 59        | 36/49/5/8/2                  |
| 10                                                                                 | Ru/C (2,5)                              | <i>i</i> PrOH | 20                   | 80     | NH <sub>4</sub> OH (100μL) | 100       | 57/5/1/32/5                  |
| 11                                                                                 | RaneyNi (100μL)                         | <i>i</i> PrOH | 20                   | 80     | NH <sub>4</sub> OH (100μL) | 60        | 25/68/1/6/0                  |
| 12                                                                                 | RaneyNi (200μL)                         | <i>i</i> PrOH | 20                   | 80     | NH <sub>4</sub> OH (100μL) | 100       | 94/0/0/5/1                   |

Reaction conditions: adiponitrile (0.15mmol), catalyst (1-2.5 mol%), 80 °C, 6h. Yields and conversions were determined by GC/FID and <sup>1</sup>H-NMR spectroscopic analysis using anisole as external standard.

### S3. References

- (1) Guenani, N.; Barawi, M.; Villar-García, I. J.; Bisquert, J.; De La Peña O'Shea, V. A.; Guerrero, A. Highly Porous Ti-Ni Anodes for Electrochemical Oxidations. *Sustain Energy Fuels* **2020**, *4* (8), 4003–4007. <https://doi.org/10.1039/d0se00242a>.
